# Supplementary material
Source: publisher site journal article supplement (https://www.dovepress.com/article/554163)
Supplement: Supplementary file 1 [file 554163%20Revised%20Supplementary%20Material.docx]

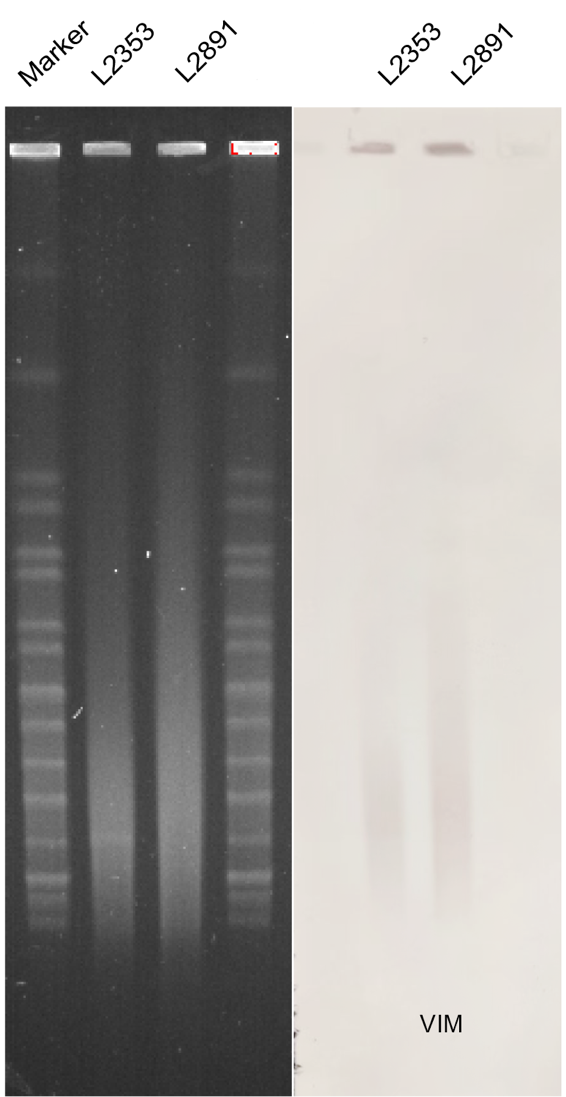


**Figure S1.** Analysis of VIM gene location in strains L2353 and L2891. (A) S1 nuclease pulsed-field gel electrophoresis (S1-PFGE) analysis showing no detectable plasmid bands. (B)PCR detection of VIM genes confirming their presence. These results suggest that the VIM genes are chromosomally encoded in both strains.

**Table S1.** Characteristics of 60 *Pseudomonas juntendi* genome sequences analyzed in this study. The data were downloaded from the NCBI database.

| **GenBank No.** | **Location** | **Carbapenemases** |
| --- | --- | --- |
| GCA_009932375.1 | Japan |  |
| GCA_014062085.1 | Brazil | VIM-2, IMP-16 |
| GCA_014062135.1 | Brazil | IMP-1 |
| GCA_014062185.1 | Brazil | VIM-2, IMP-16 |
| GCA_014062235.1 | Brazil | VIM-2, IMP-16 |
| GCA_014062265.1 | Brazil |  |
| GCA_014062275.1 | Brazil | VIM-2 |
| GCA_014062305.1 | Brazil | VIM-2 |
| GCA_016009075.1 | USA |  |
| GCA_016009085.1 | USA |  |
| GCA_016337345.1 | USA |  |
| GCA_018138545.1 | Russia |  |
| GCA_021282385.2 | Poland | VIM-2 |
| GCA_021538695.1 | India | VIM-2 |
| GCA_021601465.1 | Japan |  |
| GCA_021601865.1 | Japan |  |
| GCA_021602565.1 | Japan |  |
| GCA_021602645.1 | Japan |  |
| GCA_021725455.1 | China | IMP-1 |
| GCA_023093585.1 | Brazil | KPC-2 |
| GCA_023093635.1 | Brazil | KPC-2 |
| GCA_023572605.1 | Brazil | VIM-2 |
| GCA_024107335.1 | China | IMP-15, NDM-1 |
| GCA_024520495.1 | China | IMP-1 |
| GCA_024542835.1 | China | IMP-1 |
| GCA_025263645.1 | China |  |
| GCA_028994055.1 | China |  |
| GCA_029836535.1 | USA |  |
| GCA_029836655.1 | USA |  |
| GCA_029836765.1 | USA |  |
| GCA_029837135.1 | USA |  |
| GCA_029837475.1 | USA |  |
| GCA_029837635.1 | USA |  |
| GCA_029838345.1 | USA |  |
| GCA_029840075.1 | Pakistan | VIM-2 |
| GCA_029842215.1 | Pakistan | VIM-2 |
| GCA_029842905.1 | Pakistan |  |
| GCA_029844565.1 | Pakistan |  |
| GCA_030020925.1 | Malaysia |  |
| GCA_031974475.1 | USA |  |
| GCA_031980865.1 | USA |  |
| GCA_032004985.1 | USA |  |
| GCA_032070985.1 | USA |  |
| GCA_033031555.1 | Pakistan | VIM-2, NDM-1 |
| GCA_037094715.1 | China | NDM-1 |
| GCA_037094725.1 | China | NDM-1 |
| GCA_037149235.1 | USA |  |
| GCA_037149295.1 | USA |  |
| GCA_037149435.1 | USA |  |
| GCA_037149885.1 | USA |  |
| GCA_037150255.1 | UK |  |
| GCA_037150315.1 | UK |  |
| GCA_040704735.1 | Portugal | IMP-8 |
| GCA_040705015.1 | Portugal |  |
| GCA_040750175.1 | USA |  |
| GCA_040811575.1 | China |  |
| GCA_043103875.1 | China |  |
| GCA_044540685.1 | Ecuador |  |
| L2353hy* | China | VIM-2 |
| L2891hy* | China | VIM-2 |

*the isolates sequenced in this study
